# Proinflammatory Cytokines, Insulin Resistance, and Insulin Secretion in Chronic Hepatitis C patients

A case-control study

ALBERT LECUBE, MD<sup>1</sup>  
CRISTINA HERNÁNDEZ, MD<sup>1</sup>

JOAN GENESCÀ, MD<sup>2</sup>  
RAFAEL SIMÓ, MD<sup>1</sup>

**OBJECTIVE** — The purpose of this study was to explore the initial pathogenic mechanisms of diabetes associated with hepatitis C virus (HCV) infection.

**RESEARCH DESIGN AND METHODS** — Insulin resistance, proinflammatory cytokines, and  $\beta$ -cell function were evaluated in a case-control study. A total of 28 consecutive nondiabetic patients with chronic hepatitis C were included in the study (anti-HCV<sup>+</sup>). Fourteen patients with chronic hepatitis other than HCV infection served as the control group (anti-HCV<sup>-</sup>). Both groups were closely matched by the main clinical variables associated with insulin resistance and the degree of liver fibrosis. In addition, there were no differences between groups regarding hepatic insulin extraction measured by calculating the ratio between C-peptide and insulin. Serum levels of proinflammatory cytokines (tumor necrosis factor [TNF]- $\alpha$ , soluble TNF receptor [sTNFR] 1, soluble TNFR2, and interleukin-6) were measured by enzyme-linked immunosorbent assay. Insulin resistance (homeostasis model assessment [HOMA] of insulin resistance [HOMA-IR]) and insulin secretion at baseline (HOMA- $\beta$ ) and after various stimulus (oral glucose tolerance test, standard food intake, and intravenous glucagon) were determined by previously validated mathematic indexes.

**RESULTS** — HOMA-IR was higher in anti-HCV<sup>+</sup> than in anti-HCV<sup>-</sup> patients ( $4.35 \pm 2.27$  vs.  $2.58 \pm 1.74$ ;  $P = 0.01$ ). All the proinflammatory cytokines analyzed were significantly higher in anti-HCV<sup>+</sup> patients than in anti-HCV<sup>-</sup> patients. In addition, sTNFR1 and sTNFR2 were directly correlated to HOMA-IR. HOMA- $\beta$  as well as insulin and C-peptide responses after the intravenous glucagon test were significantly higher in anti-HCV<sup>+</sup> patients than in anti-HCV<sup>-</sup> patients.

**CONCLUSIONS** — Insulin resistance mediated by proinflammatory cytokines, but not a deficit in insulin secretion, could be the primary pathogenic mechanism involved in the development of diabetes associated with HCV infection.

*Diabetes Care* 29:1096–1101, 2006

Large community-based studies have shown that hepatitis C virus (HCV) infection is strongly associated with diabetes (1,2). In addition, a high prevalence of both diabetes and impaired fast-

ing glucose has been reported in HCV-infected patients in comparison with other chronic liver diseases (3–5).

Although the specific mechanisms involved in the pathogenesis of diabetes as-

sociated with HCV remain to be elucidated, it seems that insulin resistance plays an essential role (6,7). High levels of proinflammatory cytokines have been found in HCV-infected patients and, thereby, they could be involved in the pathogenesis of insulin resistance associated with HCV (8,9). On the other hand,  $\beta$ -cell dysfunction might also be related to glucose abnormalities in HCV chronic hepatitis (10,11). However, there are no studies in which insulin secretion, insulin resistance, and proinflammatory cytokines have been measured in HCV-infected patients with chronic hepatitis in comparison with HCV<sup>-</sup> patients with other chronic liver diseases. Because type 2 diabetes is associated with both insulin resistance and a deficit of insulin secretion, as well as with high levels of proinflammatory cytokines, this condition should be excluded when the specific effect of HCV is evaluated.

On this basis, the aim of this study is to explore for the first time the initial mechanisms involved in diabetes development in HCV infection. For this purpose, insulin resistance, proinflammatory cytokines (tumor necrosis factor [TNF]- $\alpha$ , soluble TNF- $\alpha$  receptor [sTNFR] 1 and sTNFR2, and interleukin [IL]-6), and  $\beta$ -cell function were compared between nondiabetic noncirrhotic patients with chronic HCV infection and closely matched HCV<sup>-</sup> patients with other chronic liver diseases according to the main clinical variables influencing insulin resistance and the degree of liver fibrosis. This approach has enabled us to further understand the pathogenic mechanisms that could lead to diabetes development in HCV-infected patients.

## RESEARCH DESIGN AND METHODS

A total of 28 consecutive nondiabetic patients with chronic hepatitis due to HCV infection who were attending the outpatient liver unit of our university hospital were included in the study. Fourteen patients with chronic hepatitis other than HCV infection and

From the <sup>1</sup>Diabetes Research Unit, Endocrinology Division, Institut de Recerca, Hospital Universitari Vall d'Hebron, Universitat Autònoma de Barcelona, Barcelona, Spain; and the <sup>2</sup>Liver Unit, Institut de Recerca, Hospital Universitari Vall d'Hebron, Universitat Autònoma de Barcelona, Barcelona, Spain.

Address correspondence and reprint requests to Dr. Rafael Simó, Diabetes Research Unit, Endocrinology Division, Hospital Universitari Vall d'Hebron, Pg. Vall d'Hebron 119-129, 08035 Barcelona, Spain. E-mail: rsimo@ir.vhebron.net.

Received for publication 21 December 2005 and accepted in revised form 31 January 2006.

**Abbreviations:** AUC, area under the curve; HCV, hepatitis C virus; HOMA, homeostasis model assessment; HOMA-IR, HOMA of insulin resistance; IL, interleukin; OGTT, oral glucose tolerance test; TNF, tumor necrosis factor; sTNFR, soluble TNF receptor.

A table elsewhere in this issue shows conventional and Système International (SI) units and conversion factors for many substances.

DOI: 10.2337/dc05-2509

© 2006 by the American Diabetes Association.

The costs of publication of this article were defrayed in part by the payment of page charges. This article must therefore be hereby marked "advertisement" in accordance with 18 U.S.C. Section 1734 solely to indicate this fact.

**Table 1—Clinical features and biochemical parameters of the nondiabetic patients with chronic hepatitis classified according to anti-HCV status**

|                                       | Anti-HCV <sup>−</sup> | Anti-HCV <sup>+</sup> | P value |
|---------------------------------------|-----------------------|-----------------------|---------|
| n                                     | 14                    | 28                    |         |
| Age (years)                           | 48.4 ± 14.3           | 48.5 ± 11.6           | 0.97    |
| Sex (male/female)                     | 5/9                   | 10/18                 | 0.63    |
| BMI (kg/m <sup>2</sup> )              | 25.9 ± 4.3            | 25.8 ± 3.2            | 0.99    |
| Waist-to-hip ratio                    | 0.8 ± 0.08            | 0.8 ± 0.06            | 0.68    |
| Family history of type 2 diabetes (%) | 3 (21.4)              | 7 (25)                | 0.13    |
| Fasting glucose (mmol/l)              | 5.10 ± 0.61           | 5.27 ± 0.47           | 0.44    |
| Triglycerides (mmol/l)                | 1.1 (0.54–2.14)       | 0.85 (0.50–2.27)      | 0.17    |
| Aspartate aminotransferase (IU/l)     | 38.6 ± 15.7           | 37.4 ± 14.4           | 0.81    |
| Alanine aminotransferase (IU/l)       | 58.8 ± 36.7           | 52.2 ± 27.6           | 0.52    |
| Degree of liver fibrosis              | 2.57 ± 0.85           | 2.53 ± 0.96           | 0.90    |
| Hepatic insulin extraction            |                       |                       |         |
| C-peptide 0 min/insulin 0 min ratio   | 12.80 ± 7.38          | 12.60 ± 8.23          | 0.962   |
| C-peptide 30 min/insulin 30 min ratio | 4.48 ± 1.58           | 5.26 ± 2.13           | 0.440   |
| ΔC-peptide/Δinsulin ratio             | 6.48 ± 8.03           | 4.72 ± 1.17           | 0.550   |

Data are means ± SD or median (range).

attending the same outpatient liver unit served as control group. Both groups were carefully matched by age, sex, BMI, waist-to-hip ratio, family history of type 2 diabetes, fasting blood glucose, serum levels of triglycerides and transaminases, and the degree of hepatic fibrosis. Entry criteria included 1) absence of diabetes and glucose intolerance (fasting blood glucose <126 and <140 mg/dl after an oral glucose tolerance test [OGTT]) and 2) liver biopsy performed within 12 months before inclusion showing liver fibrosis stage ≤4 based on Ishak's classification (12). The reason for excluding patients with advanced liver fibrosis was that cirrhosis per se could lead to insulin resistance independently of HCV status. Exclusion criteria were 1) active alcohol consumption (>40 g/day for men and >20 g/day for women) or features of alcoholic disease in the liver biopsy; 2) previous treatment with interferon [because interferon can produce a transient increase of insulin resistance (13), followed by a subsequent phase of recovery or even favorable effects on insulin sensitivity in long-term treatment (14)], 3) treatment with corticosteroids or any other medication known to affect glucose tolerance or insulin secretion, and 4) the presence of other concomitant diseases or conditions such as HIV infection, hemochromatosis, chronic pancreatitis, neoplasia, renal failure, or other serious medical problems.

Informed written consent was obtained from all participants. The study was approved by the hospital's human ethics committee.

### Laboratory assessments

After an overnight fast of 12 h, venous blood was collected from the antecubital vein. Serum glucose, alanine aminotransferase, aspartate aminotransferase, and triglyceride levels were determined by standard laboratory techniques used in clinical chemistry laboratories. Anti-HCV was measured using a second-generation commercial enzyme immunoassay (Abbott Laboratories, Chicago IL). All anti-HCV<sup>+</sup> patients were HCV-RNA<sup>+</sup> as confirmed by HCV-RNA qualitative testing (Amplicor; Roche Molecular Systems, Branchburg, NJ).

Hemochromatosis gene mutations C282Y and H63D were screened for using enzymatic digestion of PCR products encompassing the mutation sites as previously described (15). The restrictive enzymes used were *RsaI* for the C282Y mutation and *BclI* for the H63D mutation.

Serum insulin was determined by radioimmunoassay (INSI-CTK IRMA; Diasorin, Reutlinger, Germany), and serum C-peptide was estimated by a competitive immunoassay (C-PEP-RIA-CT; BioSource Europe, Nivelles, Belgium). TNF-α signals through at least two known cell surface receptors (sTNFR1 and sTNFR2), and membranous shedding of these receptors reflects activation of the TNF system. Circulating levels of TNF-α are highly variable but sTNFRs are more stable proteins, thus remaining elevated in the systemic circulation for longer periods of time and, therefore, being better markers for the activation of the TNF-α system than TNF-α itself (16). TNF-α, sTNFR1,

sTNFR2, and IL-6 concentrations were measured by enzyme-linked immunosorbent assay (Quantikine; R&D Systems Europe, Abingdon Lane, U.K.).

Insulin resistance was determined by the homeostasis model assessment (HOMA-IR) according to the formula:  $\text{HOMA-IR} = [\text{fasting glucose (millimoles per liter)} \times \text{fasting insulin (milliunits per liter)}] / 22.5$ . Insulin secretion was calculated as the HOMA-β cell index according to the equation:  $\text{HOMA-}\beta = [\text{fasting insulin (milliunits per liter)} \times 20] / [\text{fasting glucose (millimoles per liter)} - 3.5]$ . Both models have been previously validated against clamp measurements (17). Apart from the HOMA-β cell index, insulin secretion was also evaluated as the area under the curve (AUC) of insulin and C-peptide obtained from three dynamic tests performed over a period of 14 days. These were 1) an OGTT with 75 g of glucose, 2) standard food (200 ml, 150 kcal: 6 g of proteins, 5.8 g of lipids, and 18.4 g of carbohydrates; Fortisip; Nutricia, Madrid, Spain) administered in a 10-min period, and 3) the intravenous administration of 1 mg of glucagon (Novo Nordisk Pharma, Bagsvaerd, Denmark). Blood samples were collected at 0, 30, 60, 90, and 120 min for OGTT; at 0, 30, 60, 90, 120, and 180 min for the standard food test; and at 0, 5, and 15 min for the glucagon test. The AUC was calculated using the GW-Basic 3.22 package (© 1987 Microsoft) for Windows. In addition, the first (1st PH) and second phase (2nd PH) of insulin release predicted by the OGTT were calculated as follows:

Table 2—Insulin resistance and  $\beta$ -cell function of the nondiabetic patients with chronic hepatitis classified according to anti-HCV status

|                                                             | Anti-HCV <sup>−</sup> | Anti-HCV <sup>+</sup> | P value |
|-------------------------------------------------------------|-----------------------|-----------------------|---------|
| HOMA-IR                                                     | 2.58 ± 1.74           | 4.35 ± 2.27           | 0.01    |
| Insulin (pmol/l)                                            | 66.2 ± 41.7           | 114.2 ± 57.6          | 0.01    |
| C-peptide (pmol/l)                                          | 744 ± 408             | 1257 ± 275            | 0.03    |
| HOMA- $\beta$                                               | 151.5 ± 111.6         | 229.6 ± 147.1         | 0.02    |
| 1st phase (pmol)                                            | 1,380.5 ± 580.8       | 1,608.6 ± 709.9       | 0.45    |
| 2nd phase (pmol)                                            | 365.4 ± 133.1         | 418.8 ± 167.1         | 0.45    |
| OGTT                                                        | 3,482.1 ± 729.3       | 4,381.9 ± 2969        | 0.42    |
| AUC C-peptide (pmol · l <sup>−1</sup> · min <sup>−1</sup> ) | 521.7 ± 270.8         | 626.5 ± 439.3         | 0.54    |
| AUC insulin (pmol · l <sup>−1</sup> · min <sup>−1</sup> )   | 63.1 ± 21.5           | 70.4 ± 25.1           | 0.31    |
| AUC insulin/glucose (pmol/mmol)                             |                       |                       |         |
| Standard food intake:                                       | 2,173.2 ± 968.2       | 2,493.2 ± 449.4       | 0.35    |
| AUC C-peptide (pmol · l <sup>−1</sup> · min <sup>−1</sup> ) | 250.2 ± 138           | 328.6 ± 162.4         | 0.43    |
| AUC insulin (pmol · l <sup>−1</sup> · min <sup>−1</sup> )   | 39.2 ± 20.8           | 50.4 ± 16.9           | 0.50    |
| AUC insulin/glucose (pmol/mmol)                             |                       |                       |         |
| Glucagon test                                               |                       |                       |         |
| AUC C-peptide (pmol · l <sup>−1</sup> · min <sup>−1</sup> ) | 1,640.6 ± 882.9       | 2,295.7 ± 936.6       | 0.08    |
| AUC insulin (pmol · l <sup>−1</sup> · min <sup>−1</sup> )   | 270.0 ± 151.7         | 405.3 ± 156.5         | 0.04    |
| AUC insulin/glucose (pmol/mmol)                             | 36.8 ± 24.9           | 59.6 ± 27.9           | 0.04    |

Data are means ± SD.

$$\text{1st PH} = 1,283 + 1.829 \times \text{Ins}_{30} - 138.7 \times \text{Gluc}_{30} + 3.772 \times \text{Ins}_0$$

$$\text{2nd PH} = 287 + 0.4164 \times \text{Ins}_{30} - 26.07 \times \text{Gluc}_{30} + 0.9226 \times \text{Ins}_0$$

These indexes were used because they were the best correlated with the hyperglycemic clamp ( $r = 0.78$  and  $0.79$ , respectively) in an adult nondiabetic white population with an ethnicity and a range of age and BMI similar to patients included in our study (18).

Hepatic insulin extraction was assessed by calculating the molar ratio between C-peptide and insulin in the fasting state and at 30 min after OGTT and by the molar ratio of the incremental areas over 2 h between C-peptide and insulin (19).

### Statistical analysis

Comparisons between groups were made using the Student's  $t$  test for continuous variables and the  $\chi^2$  test for categorical variables. Results are expressed as the mean ± SD or as median (range). All  $P$  values are based on a two-sided test of statistical significance. Significance was accepted at the level of  $P < 0.05$ . Statistical analyses were performed with the SPSS statistical package.

**RESULTS**— The clinical and biochemical features of patients included in

the study are shown in Table 1. Both groups were well-matched for age, sex, BMI, waist-to-hip ratio, fasting glucose, triglyceride and transaminase levels, degree of liver fibrosis, and hepatic insulin extraction.

The results for insulin resistance and insulin secretion are shown in Table 2. Basal insulin levels were significantly higher in anti-HCV<sup>+</sup> patients, thus leading to higher HOMA-IR values in comparison with anti-HCV<sup>−</sup> patients ( $4.35 \pm 2.27$  vs.  $2.58 \pm 1.74$ ;  $P = 0.01$ ). HOMA- $\beta$  was significantly higher in anti-HCV<sup>+</sup> than in anti-HCV<sup>−</sup> patients ( $229.6 \pm 147.2$  vs.  $151.5 \pm 111.6$ ;  $P = 0.02$ ). The first and second phases of insulin release after OGTT were higher in anti-HCV<sup>+</sup> patients but without statistical significance. In addition, we did not detect any significant difference between groups in the insulin secretory indexes after OGTT and the standard food test. However, anti-HCV<sup>+</sup> patients showed a

higher AUC of insulin and ratio of insulin to glucose after the glucagon test.

Serum levels of TNF- $\alpha$ , sTNFR1, sTNFR2, and IL-6 were higher in anti-HCV<sup>+</sup> than in anti-HCV<sup>−</sup> patients (Table 3). Furthermore, sTNFR1 and sTNFR2 were directly correlated to HOMA-IR (Fig. 1).

**CONCLUSIONS**— The mechanisms leading to insulin resistance and diabetes in HCV-infected patients remain to be clarified. In this study we provide the first evidence that nondiabetic HCV-infected patients have higher insulin resistance than patients with other chronic liver diseases in association with the activation of TNF- $\alpha$  system and high IL-6 levels. Because HCV<sup>+</sup> and HCV<sup>−</sup> patients have been closely matched by the main clinical variables related to insulin resistance, HCV infection is the single feature accounting for the differences in insulin resistance detected between the groups.

Table 3—Proinflammatory cytokines in anti-HCV<sup>+</sup> nondiabetic patients with chronic hepatitis in comparison with anti-HCV<sup>−</sup> patients

|                       | Anti-HCV <sup>−</sup> | Anti-HCV <sup>+</sup> | P value |
|-----------------------|-----------------------|-----------------------|---------|
| <i>n</i>              | 14                    | 28                    |         |
| TNF- $\alpha$ (pg/ml) | 2.71 ± 3.06           | 6.47 ± 3.44           | 0.007   |
| sTNFR1 (pg/ml)        | 1,494.16 ± 270.63     | 1,739.58 ± 347.35     | 0.040   |
| sTNFR2 (pg/ml)        | 2,417.50 ± 815.59     | 2,999.16 ± 785.55     | 0.046   |
| IL-6 (pg/ml)          | 2.07 ± 1.02           | 3.78 ± 1.45           | 0.002   |

Data are means ± SD.

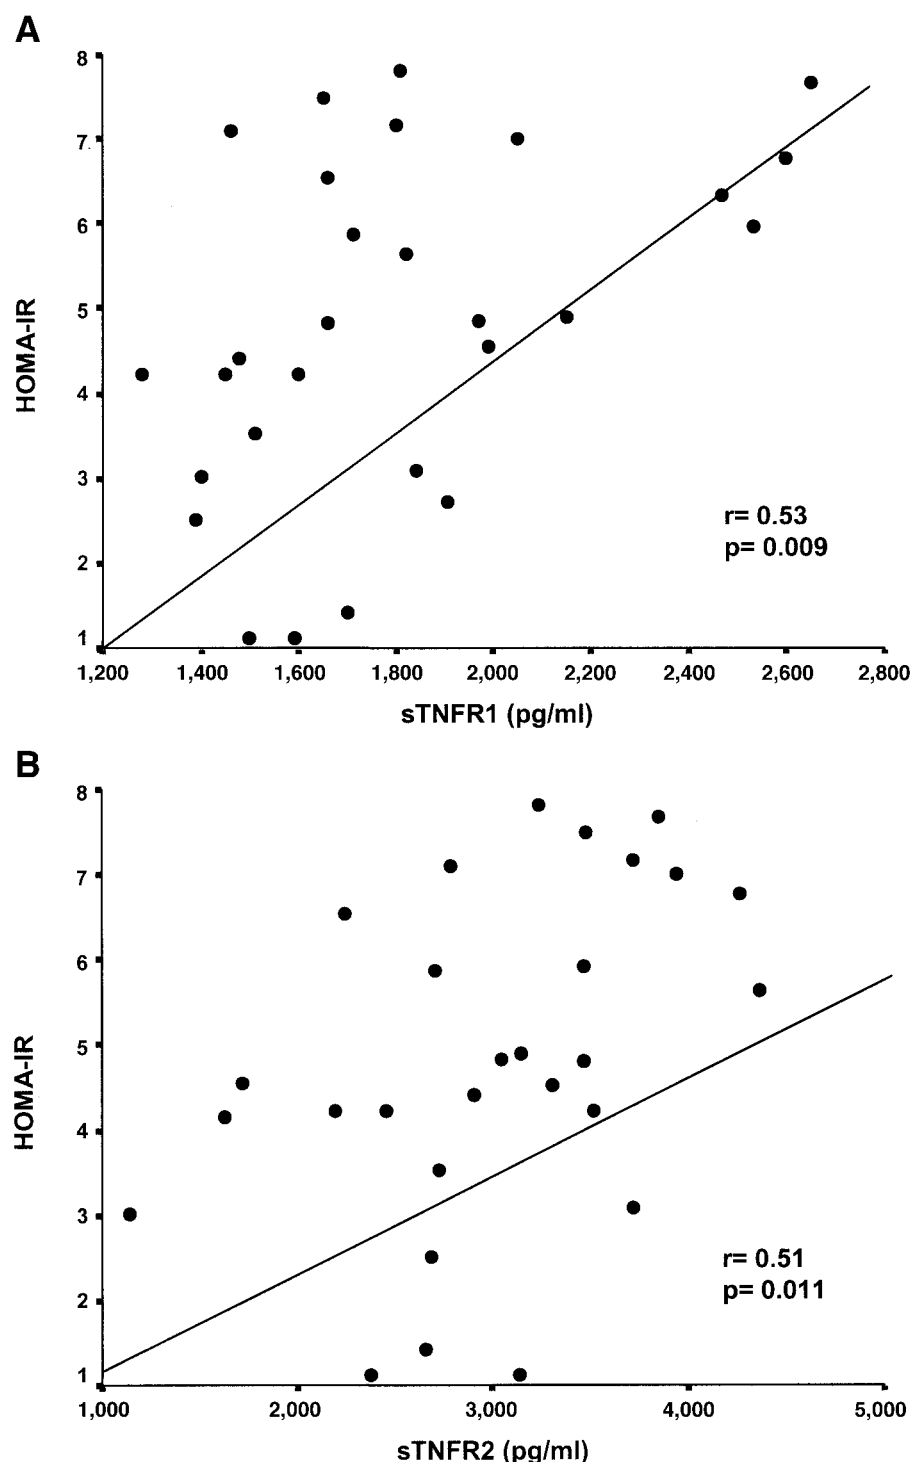

**Figure 1**—Correlations of sTNFR1 (A) and sTNFR2 (B) with HOMA-IR in anti-HCV<sup>+</sup> patients.

Therefore, it seems that insulin resistance will be crucial in the development of diabetes associated with HCV infection.

It could be argued that hyperinsulinemia detected in HCV-infected patients might be due to a diminished hepatic insulin degradation rate by the diseased liver, thus leading to a false increase of the HOMA-IR. However, both groups of pa-

tients (anti-HCV<sup>+</sup> and anti-HCV<sup>-</sup>) had a similar degree of liver fibrosis as well as a hepatic insulin extraction index, the latter being in the same range as has been reported in healthy individuals (20).

The relation between inflammation and insulin resistance in the pathogenesis of type 2 diabetes is well known (21). Cytokines such as TNF- $\alpha$  and IL-6 have

been related to insulin resistance and type 2 diabetes development (22–25). Several reports have shown an increase in serum levels of TNF- $\alpha$  and its receptors as well as IL-6 in HCV-infected patients (26–31). Moreover, liver biopsy specimens from nondiabetic HCV patients revealed significant impairments in the insulin signaling pathways (32), which were strikingly similar to TNF- $\alpha$  effects (33,34). Shintani et al. (7), using a transgenic mouse model that specifically expressed the HCV core protein in hepatocytes, have shown direct experimental evidence of HCV infection in the development of insulin resistance, which finally leads to the development of type 2 diabetes. In addition, in this study the role of TNF- $\alpha$  in the pathogenesis of the HCV-associated insulin resistance state is strongly suggested. Recently, Romero-Gómez et al. (6) demonstrated in nondiabetic patients that the clearance of HCV after antiviral therapy induces an improvement in insulin resistance, but no data on proinflammatory cytokines was reported. In the present study, proinflammatory cytokines in HCV<sup>+</sup> and HCV<sup>-</sup> patients with chronic hepatitis without diabetes and without advanced liver fibrosis have been compared for the first time. The increased levels of sTNFR1 and sTNFR2 detected in HCV-infected patients and their relationship with HOMA-IR strongly suggest that TNF- $\alpha$  is a mechanism by which HCV-infected patients are more prone to develop type 2 diabetes than patients with other chronic liver diseases.

A deficit in insulin secretion is another potential mechanism involved in diabetes associated with HCV infection. HCV infection has been linked to immunologic disorders such as cryoglobulinemia, glomerulonephritis, thyroiditis, and Sjögren syndrome (35). In addition, HCV shares regional amino acid homology with pancreatic islet autoantigens (36). Therefore, it might be thought that HCV could trigger an immune reaction against the  $\beta$ -cell, leading to diabetes. However, in a previous study we ruled out autoimmunity phenomena as a mechanism involved in diabetes associated with HCV infection (37). Direct HCV-induced damage in  $\beta$ -cells might be another mechanism involved in insulin secretion impairment. Certain viruses such as mumps and Cocksackie have been found to infect human  $\beta$ -cells (38–40). Although HCV is an hepatotropic virus, it has also been identified in extrahepatic tissues, including the pancreas. Recently,



Masini et al. (10) have detected virus-like particles in pancreatic  $\beta$ -cells from HCV<sup>+</sup> donors associated with morphological changes and a reduced in vitro glucose-stimulated insulin release. However, we have not found a decrease of  $\beta$ -cell function in nondiabetic anti-HCV<sup>+</sup> patients in comparison with anti-HCV<sup>-</sup> patients with chronic hepatitis. By contrast, in HCV-infected subjects, we observed an increase of insulin secretion assessed by HOMA- $\beta$  and the glucagon test. These results suggest that the insulin secretory function is preserved in HCV-infected patients when insulin resistance is already present. Furthermore, insulin secretion is increased in the initial stages of HCV infection to compensate for insulin resistance. Obviously, the transition from normal to impaired fasting glucose and diabetes will require the progressive deterioration of insulin secretion.

In summary, our results support the hypothesis that insulin resistance mediated by proinflammatory cytokines, but not a deficit in insulin secretion, is the primary pathogenic mechanism involved in the development of diabetes associated with HCV infection. However, prospective studies to confirm this issue are needed.

**Acknowledgments**—This study was supported by grants from the Fundació La Marató TV3 (99/2610), Novo Nordisk Pharma (01/0066), and the Instituto de Salud Carlos III (G03/212, C03/08, and C03/02).

## References

1. Mehta SH, Brancati FL, Sulkowski MS, Strathdee SA, Szklo M, Thomas DL: Prevalence of type 2 diabetes mellitus among persons with hepatitis C virus infection in the United States. *Ann Intern Med* 133:592–599, 2000
2. Wang CS, Wang ST, Yao WJ, Chang TT, Chou P: Community-based study of hepatitis C virus infection and type 2 diabetes: an association affected by age and hepatitis severity status. *Am J Epidemiol* 158:1154–1160, 2003
3. Mason AL, Lau JY, Hoang N, Qian K, Alexander GJ, Xu L, Guo L, Jacob S, Regenstein FG, Zimmerman R, Everhart JE, Wasserfall C, Maclaren NK, Perrillo RP: Association of diabetes mellitus and chronic hepatitis C virus infection. *Hepatology* 29:328–333, 1999
4. Mehta SH, Brancati FL, Sulkowski MS, Strathdee SA, Szklo M, Thomas DL: Prevalence of type 2 diabetes mellitus among persons with hepatitis C virus infection in the United States. *Hepatology* 3: 1554, 2001
5. Lecube A, Hernández C, Genesca J, Esteban JI, Jardi R, Simó R: High prevalence of glucose abnormalities in patients with hepatitis C virus infection: a multivariate analysis considering the liver injury. *Diabetes Care* 27:1171–1175, 2004
6. Romero-Gómez M, Del Mar Viloria M, Andrade RJ, Salmeron J, Diago M, Fernandez-Rodriguez CM, Corpas R, Cruz M, Grande L, Vazquez L, Munoz-De-Rueda P, Lopez-Serrano P, Gila A, Gutierrez ML, Perez C, Ruiz-Extremera A, Suarez E, Castillo J: Insulin resistance impairs sustained response rate to peginterferon plus ribavirin in chronic hepatitis C patients. *Gastroenterology* 128:636–641, 2005
7. Shintani Y, Fujie H, Miyoshi H, Tsutsumi T, Tsukamoto K, Kimura S, Moriya K, Koike K: Hepatitis C virus infection and diabetes: direct involvement of the virus in the development of insulin resistance. *Gastroenterology* 126:840–848, 2004
8. Knobler H, Zhornitsky T, Sandler A, Haran N, Ashur Y, Schattner A: Tumor necrosis factor- $\alpha$ -induced insulin resistance may mediate the hepatitis C virus-diabetes association. *Am J Gastroenterol* 98:2751–2756, 2003
9. Elsamak M, Refai W, Elawaf A, Abdel-Fattah I, Elatti A, Ghazal A: Elevated serum tumor necrosis alpha and ferritin may contribute to the insulin resistance found in HCV positive Egyptian patients. *Curr Med Res Opin* 21:527–534, 2005
10. Masini M, Campani D, Boggi U, Menicagli M, Funel N, Pollera M, Lupi R, Del Guerra S, Bugliani M, Torri S, Del Prato S, Mosca F, Filipponi F, Marchetti P: Hepatitis C virus infection and human pancreatic  $\beta$ -cell dysfunction. *Diabetes Care* 28: 940–941, 2005
11. Narita R, Abe S, Kihara Y, Akiyama T, Tabarau A, Otsuki M: Insulin resistance and insulin secretion in chronic hepatitis C virus infection. *J Hepatol* 41:132–138, 2004
12. Ishak K, Baptista A, Bianchi L, Callea F, De Groote J, Gudat F, Denk H, Desmet V, Korb G, MacSween RN, Phillips JM, Portmann BG, Poulsen H, Scheuer PJ, Schmid M, Thaler H: Histological grading and staging of chronic hepatitis. *J Hepatol* 22: 696–699, 1995
13. Imano E, Kanda T, Ishigami Y, Kubota M, Ikeda M, Matsuhisa M, Kawamori R, Yamasaki Y: Interferon induces insulin resistance in patients with chronic active hepatitis C. *J Hepatol* 28:189–193, 1998
14. Konrad T, Zeuzem S, Vicini P, Toffolo G, Briem D, Lormann J, Herrmann G, Berger A, Kusterer K, Teuber G, Cobelli C, Usadel KH: Evaluation of factors controlling glucose tolerance in patients with HCV infection before and after 4 months therapy with interferon- $\alpha$ . *Eur J Clin Invest* 30: 111–121, 2000
15. Olynyk JK, Cullen DJ, Aquilia S, Rossi E, Summerville L, Powell LW: A population-based study of the clinical expression of the hemochromatosis gene. *N Engl J Med* 341:718–724, 1999
16. Diez-Ruiz A, Tilz GP, Zangerle R, Baier-Bitterlich G, Wachter H, Fuchs D: Soluble receptors for tumour necrosis factor in clinical laboratory diagnosis. *Eur J Haematol* 54:1–8, 1995
17. Matthews DR, Hosker JP, Rudenki AS, Naylor BA, Treacher DF, Turner RC: Homeostasis model assessment: insulin resistance and  $\beta$ -cell function from fasting plasma glucose and insulin concentrations in man. *Diabetologia* 28:412–419, 1985
18. Stumvoll M, Mitrakou A, Pimenta W, Jenssen T, Yki-Järvinen H, Van Haefen T, Renn W, Gerich J: Use of the oral glucose tolerance test to assess insulin release and insulin sensitivity. *Diabetes Care* 23:295–301, 2000
19. Iwasaki Y, Ohkubo A, Kajinuma H, Akanuma Y, Kosaka K: Degradation and secretion of insulin in hepatic cirrhosis. *J Clin Endocrinol Metab* 47:774–779, 1978
20. Pimenta WP, Santos ML, Cruz NS, Aragon FF, Padovani CR, Gerich JE: Insulin secretion, insulin sensitivity, and hepatic insulin extraction in first-degree relatives of type 2 diabetic patients. *Braz J Med Biol Res* 36:301–308, 2003
21. Fernández-Real JM, Ricart W: Insulin resistance and inflammation in an evolutionary perspective: the contribution of cytokine genotype/phenotype to thriftiness. *Diabetologia* 42:1367–1374, 1999
22. Fernandez-Real JM, Broch M, Ricart W, Casamitjana R, Gutierrez C, Vendrell J, Richart C: Plasma levels of the soluble fraction of tumor necrosis factor receptor 2 and insulin resistance. *Diabetes* 47: 1757–1762, 1998
23. Pickup JC, Chusney GD, Thomas SM, Burt D: Plasma interleukin-6, tumour necrosis factor alpha and blood cytokine production in type 2 diabetes. *Life Sci* 67: 291–300, 2000
24. Fernández-Real JM, Vayreda M, Richart C, Gutierrez C, Broch M, Vendrell J, Ricart W: Circulating interleukin 6 levels, blood pressure, and insulin sensitivity in apparently healthy men and women. *J Clin Endocrinol Metab* 86:1154–1159, 2001
25. Pradhan AD, Manson JE, Rifai N, Buring JE, Ridker PM: C-reactive protein, interleukin 6, and risk of developing type 2 diabetes mellitus. *JAMA* 286:327–334, 2001
26. Malaguarnera M, Di Fazio I, Romeo MA, Restuccia S, Laurino A, Trovato BA: Elevation of interleukin 6 levels in patients with chronic hepatitis due to hepatitis C virus. *J Gastroenterol* 32:211–215, 1997
27. Kallinowski B, Haserath K, Marinos G, Hanck C, Stremmel W, Theilmann L,

- Singer MV, Rossol S: Induction of tumour necrosis factor (TNF) receptor type p55 and p75 in patients with chronic hepatitis C virus (HCV) infection. *Clin Exp Immunol* 111:269–277, 1998
28. Zylberberg H, Rimaniol AC, Pol S, Masson A, De Groote D, Berthelot P, Bach JF, Brechot C, Zavala F: Soluble tumor necrosis factor receptors in chronic hepatitis C: a correlation with histological fibrosis and activity. *J Hepatol* 30:185–191, 1999
  29. Itoh Y, Okanoue T, Ohnishi N, Sakamoto M, Nishioji K, Nakagawa Y, Minami M, Murakami Y, Kashima K: Serum levels of soluble tumor necrosis factor receptors and effects of interferon therapy in patients with chronic hepatitis C virus infection. *Am J Gastroenterol* 94:1332–1340, 1999
  30. Cotler SJ, Reddy KR, McCone J, Wolfe DL, Liu A, Craft TR, Ferris MW, Conrad AJ, Albrecht J, Morrissey M, Ganger DR, Rosenblate H, Blatt LM, Jensen DM, Taylor MW: An analysis of acute changes in interleukin-6 levels after treatment of hepatic C with consensus interferon. *J Interferon Cytokine Res* 21:1011–1019, 2001
  31. Neuman MG, Benhamou JP, Bourliere M, Ibrahim A, Malkiewicz I, Asselah T, Martinot-Peignoux M, Shear NH, Katz GG, Akremi R, Benali S, Boyer N, Lecomte L, Le Breton V, Le Guludec G, Marcellin P: Serum tumour necrosis factor- $\alpha$  and transforming growth factor- $\beta$  levels in chronic hepatitis C patients are immunomodulated by therapy. *Cytokine* 17:108–117, 2002
  32. Aytug S, Reich D, Sapiro LE, Bernstein D, Begum N: Impaired IRS-1/PI3-kinase signaling in patients with HCV: a mechanism for increased prevalence of type 2 diabetes. *Hepatology* 38:1384–1392, 2003
  33. Greenberg AS, McDaniel ML: Identifying the links between obesity, insulin resistance and  $\beta$ -cell function: potential role of adipocyte-derived cytokines in the pathogenesis of type 2 diabetes. *Eur J Clin Invest* 32 (Suppl. 3):24–34, 2002
  34. Ruan H, Lodish HF: Insulin resistance in adipose tissue: direct and indirect effects of tumor necrosis factor- $\alpha$ . *Cytokine Growth Factor Rev* 14:447–455, 2003
  35. Nocente R, Ceccanti M, Bertazzoni G, Cammarota G, Silveri NG, Gasbarrini G: HCV infection and extrahepatic manifestations (Review). *Hepatogastroenterology* 50:1149–1154, 2003
  36. Honeyman MC, Stone NL, Harrison LC: T-cell epitopes in type 1 diabetes autoantigen tyrosine phosphatase IA2: potential for mimicry with rotavirus and other environmental agents. *Mol Med* 4:231–239, 1998
  37. Piquer S, Hernández C, Enríquez J, Ross A, Esteban JI, Genesca J, Bonifacio E, Puig-Domingo M, Simó R: Islet cell and thyroid antibody prevalence in patients with hepatitis C virus infection: effect of treatment with interferon. *J Lab Clin Med* 137:38–42, 2001
  38. Yoon JW, Austin M, Onodera T, Notkins AL: Virus-induced diabetes mellitus: isolation of a virus from the pancreas of a child with diabetic ketoacidosis. *N Engl J Med* 300: 1173–1179, 1979
  39. Helmke K, Otten A, Willems W: Islet cell antibodies in children with mumps infection (Letter). *Lancet* 2:211–212, 1980
  40. Pak CY, Eun HM, McArthur RG, Yoon JW: Association of cytomegalovirus infection with autoimmune type 1 diabetes. *Lancet* 2:1–4, 1988
